# Supplementary material
Source: PubMed Central journal article supplement (PMC3910829)
Supplement: AAC.01764-13_zac002142604so1.pdf [file AAC.01764-13_zac002142604so1.pdf]

**TABLE S1** Oligonucleotide primers<sup>a</sup>

| Name  | Sequence (5' to 3')            | GenBank ID: nucleotides       | Amplicon length (bp) |
|-------|--------------------------------|-------------------------------|----------------------|
| Tn1   | TGA CCG ATG AGC TTG TTT TG     | AE007317: 1,035,500-1,035,519 | 7,683                |
| IF330 | ATT TGG GAT TTA GCC TCA TCA A  | AF295925: 9,098-9,119         |                      |
| IF329 | CCT TAA TCG TCT CAG AAT ATC A  | L29323: 129-108               | 13,493               |
| IF334 | TGA ATA AAG AGA AGC AAC AGG A  | X90940: 116-137               |                      |
| IF487 | TTC GCT GAA GAC CTT TAT TCG    | X90940: 378-358               | 5,518                |
| IF393 | TTC TGC CGA AAT TGT AAT CA     | X90939: 2,541-2,560           |                      |
| IF394 | GCT ATA GTA TAA GCC ATA CT     | X90939: 3,621-3,602           | 13,743               |
| IF488 | TCC TCC TGA TTC CAG TGT CA     | X90941: 52-71                 |                      |
| IF333 | GAC TTT ATC CTC GCC AGC AA     | X90941: 558-539               | 16,755               |
| IF353 | CTC TCC GTC GCT ATT GTA AC     | V01277: 1,487-1,468           |                      |
| IF184 | AAC TTT AAT AAA ATT GAT TTA GA | V01277: 1,263-1,285           | 6,576                |
| IF367 | GAA TAG TTC CGA TTG AGT GAA A  | L29324: 7,511-7,532           |                      |
| IF368 | AAC AGA ATG CGA AGG TTG TAG A  | L29324: 7,841-7,820           | 8,664                |
| Tn2   | TTA ATC GTT GCC ATC GAG GT     | AE007317:1,037,162-1,037,143  |                      |
| IF460 | TGT AGA AAT CAA AGT CCT AGC    | AE007317: 931746-931766       | 12,314               |
| IF461 | ATC ATA AGA AAC AGG TGT ATG C  | AE007317: 936264-936243       |                      |

<sup>a</sup>Primers are listed in pairs, and the length of amplicons produced is reported
